# Supplementary material
Source: Springer Nature journal article supplement (https://www.springermedizin.de/resource/supplementary/12875_2013_913_MOESM6_ESM.pdf/9435408)

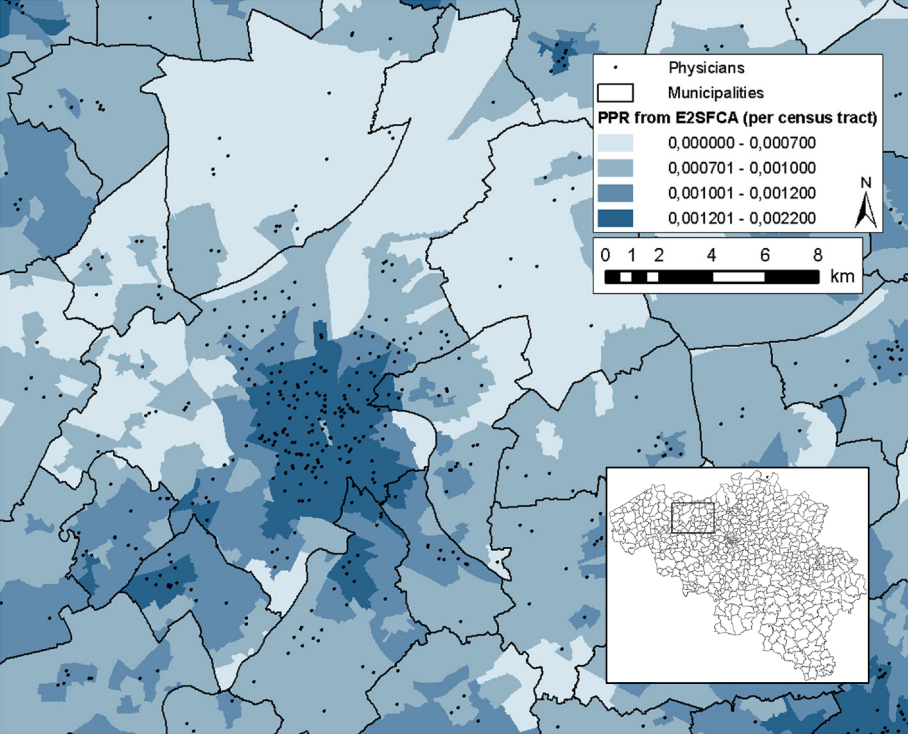

Supplement: MOESM6 [file 9435408]
